# Supplementary material for: Printed recyclable and self-poled polymer piezoelectric generators through single-walled carbon nanotube templating
Source: Royal Society of Chemistry journal article supplement (doi:10.1039/c9ee03059j), 2019-12-13
Supplement: c9ee03059j1.pdf [file c9ee03059j1.pdf]

## Supplementary Information

### 3D printed recyclable and self-poled polymer piezoelectric generators through single-walled carbon nanotube templating

Nick A. Shepelin,<sup>a</sup> Peter C. Sherrell,<sup>a</sup> Eirini Goudeli,<sup>a</sup> Emmanuel N. Skountzos,<sup>bc</sup> Vanessa C.

Lussini,<sup>d</sup> Greg W. Dicinoski,<sup>d</sup> Joseph G. Shapter<sup>e</sup> and Amanda V. Ellis<sup>\*a</sup>

<sup>a</sup> Department of Chemical Engineering, The University of Melbourne, Parkville, Victoria  
3010, Australia

<sup>b</sup> Department of Chemical Engineering, University of Patras, Greece

<sup>c</sup> FORTH/ICE-HT, Patras, GR 26504, Greece

<sup>d</sup> Note Issue Department, Reserve Bank of Australia, Craigieburn, Victoria 3062, Australia

<sup>e</sup> Australian Institute for Bioengineering and Nanotechnology, The University of Queensland,  
Brisbane, Queensland 4072, Australia

*\* Corresponding author*

*Email address:* amanda.ellis@unimelb.edu.au

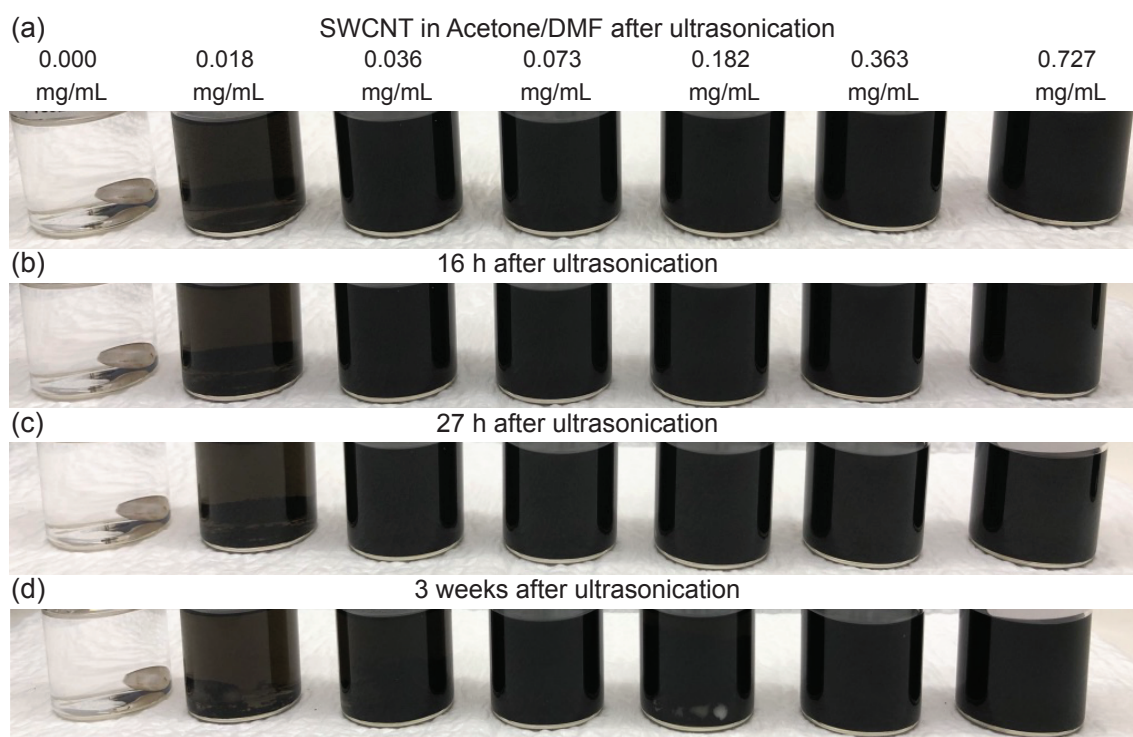

Figure S1: Images showing the SWCNTs dispersed in acetone (60 vol%) and DMF (40 vol%) after 30 min bath ultrasonication, showing concentrations between 0.000 mg mL<sup>-1</sup> and 0.727 mg mL<sup>-1</sup>, corresponding to SWCNT concentrations of between 0.000 wt% and 0.200 wt% relative to PVDF-TrFE. (a) Directly after ultrasonication in a bath sonicator. (b) 16 hours after ultrasonication. (c) 27 hours after ultrasonication. (d) 3 weeks after ultrasonication.

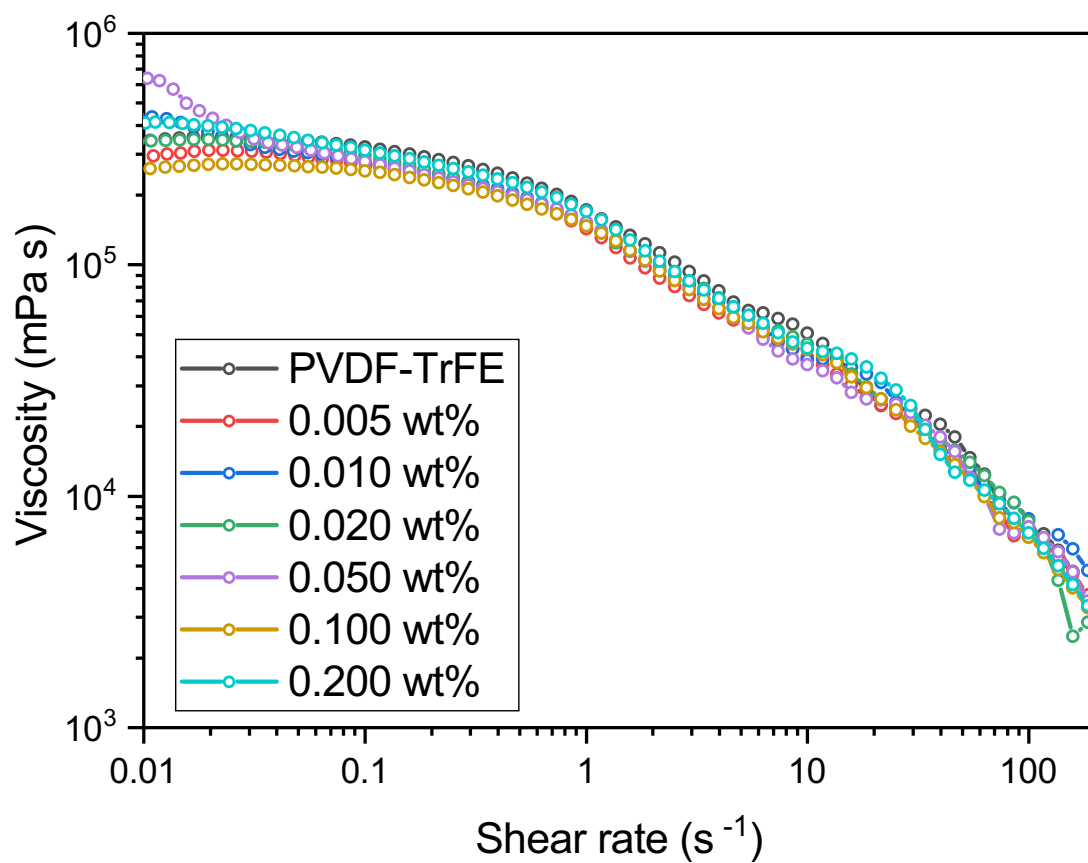

Figure S2: The viscosity of SWCNT/PVDF-TrFE (0.000 wt% to 0.200 wt%) inks as a function of shear rate.

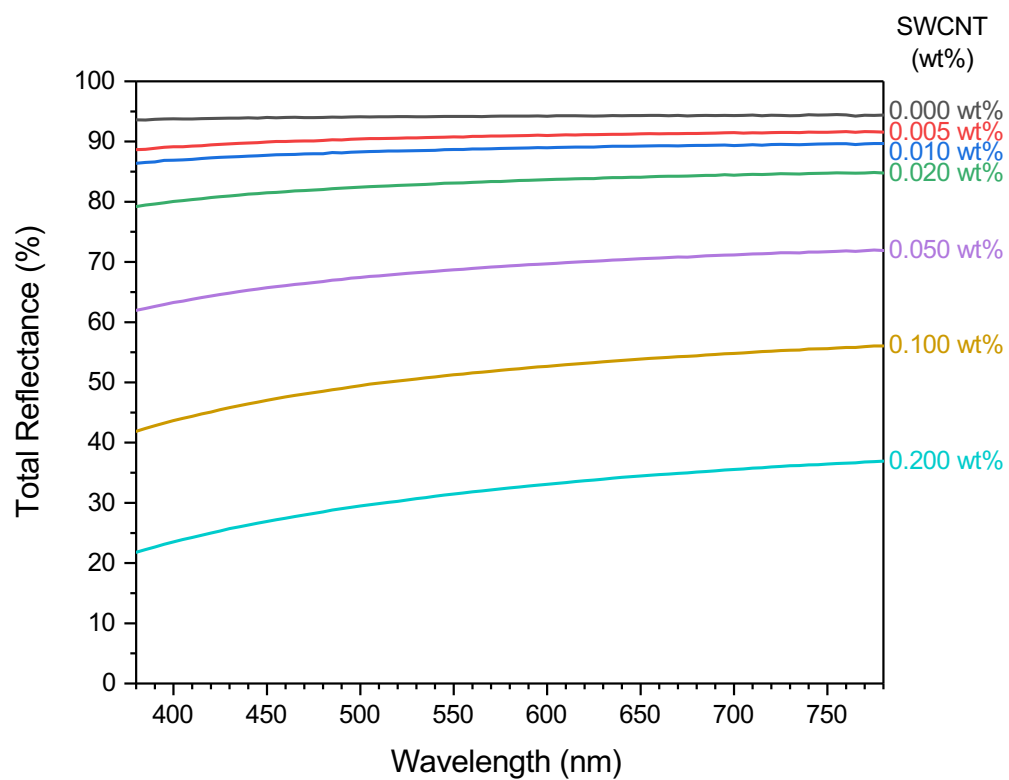

Figure S3: The visible wavelength ( $380\text{ nm} < \lambda < 780\text{ nm}$ ) transmittance of the SWCNT/PVDF-TrFE (0.000 wt% to 0.200 wt%) films, shown as the total reflectance within the integrating sphere.

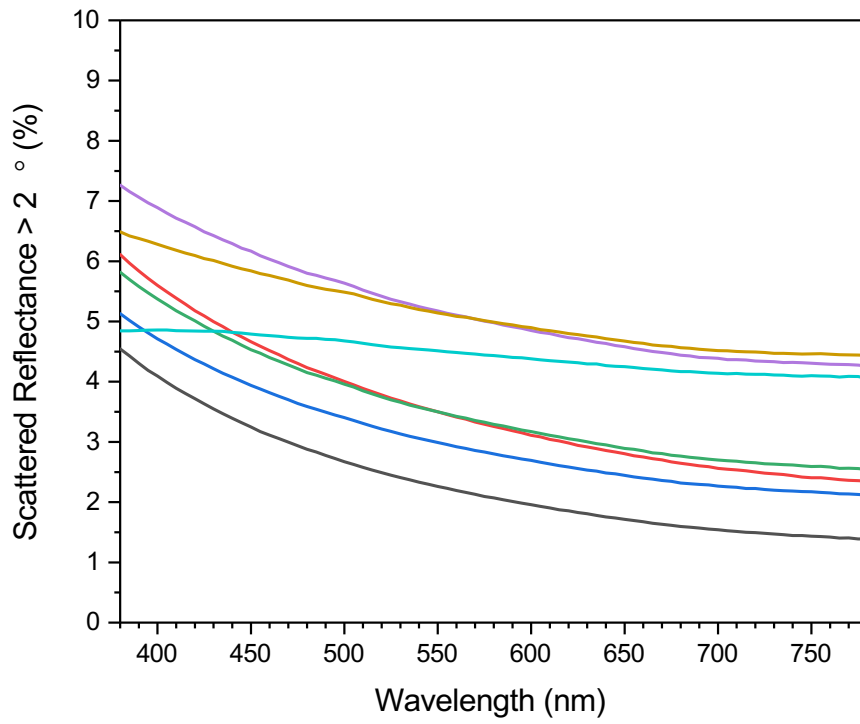

Figure S4: The visible wavelength ( $380\text{ nm} < \lambda < 780\text{ nm}$ ) transmittance at angles  $> 2^\circ$  of the SWCNT/PVDF-TrFE (0.000 wt% to 0.200 wt%) films, shown as the scattered reflectance within the integrating sphere.

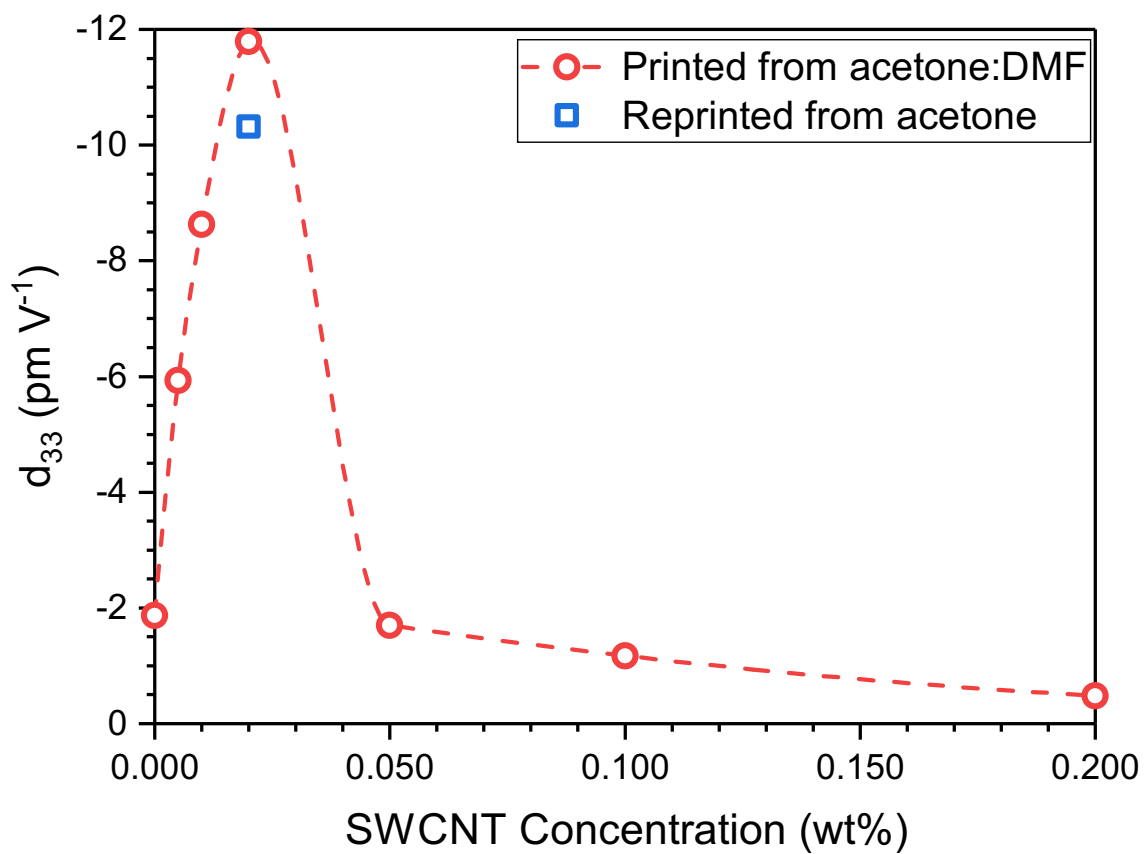

Figure S5: The  $d_{33}$  values calculated using PFM at +10 V for the initial 3D printed SWCNT/PVDF-TrFE (0.000 wt% to 0.200 wt%) films (shown in red) and the SWCNT/PVDF-TrFE (0.020 wt%) film recycled and reprinted from acetone (shown in blue).

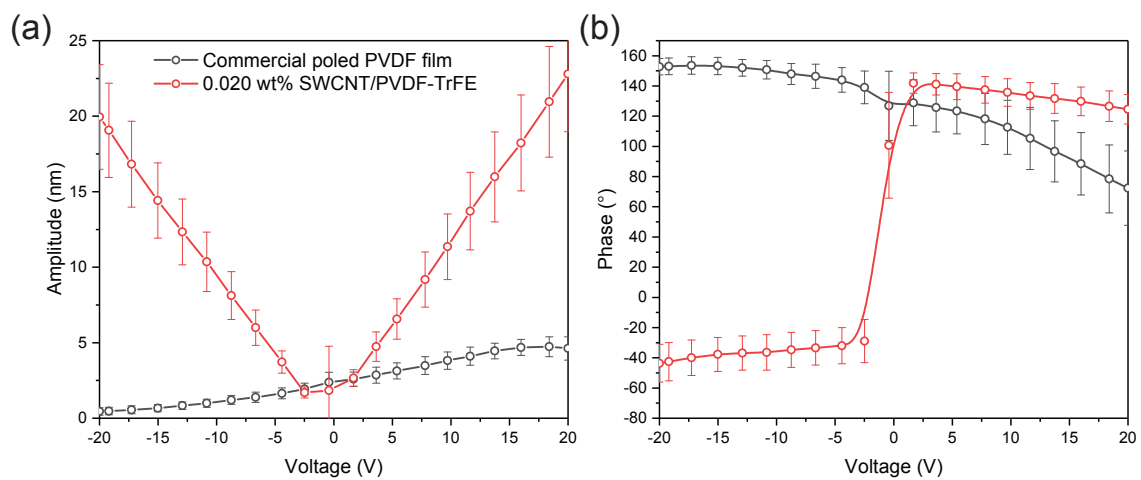

Figure S6: PFM lithography (a) amplitude and (b) phase plots showing the data obtained for the extrusion printed 0.020 wt% SWCNT/PVDF-TrFE film (red) and the commercially available poled PVDF film (grey) (Measurement Specialities).

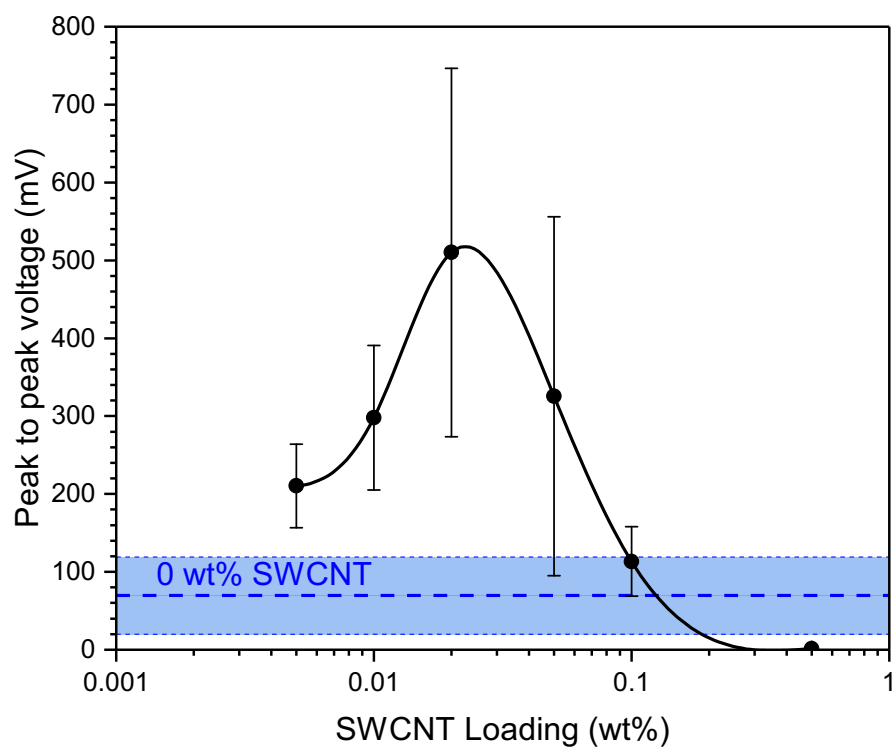

Figure S7: Peak to peak voltage ( $V_{pp}$ ) of SWCNT/PVDF-TrFE (0.000 wt% to 0.500 wt%) PEGs, with error presented for three separate samples at each data point.



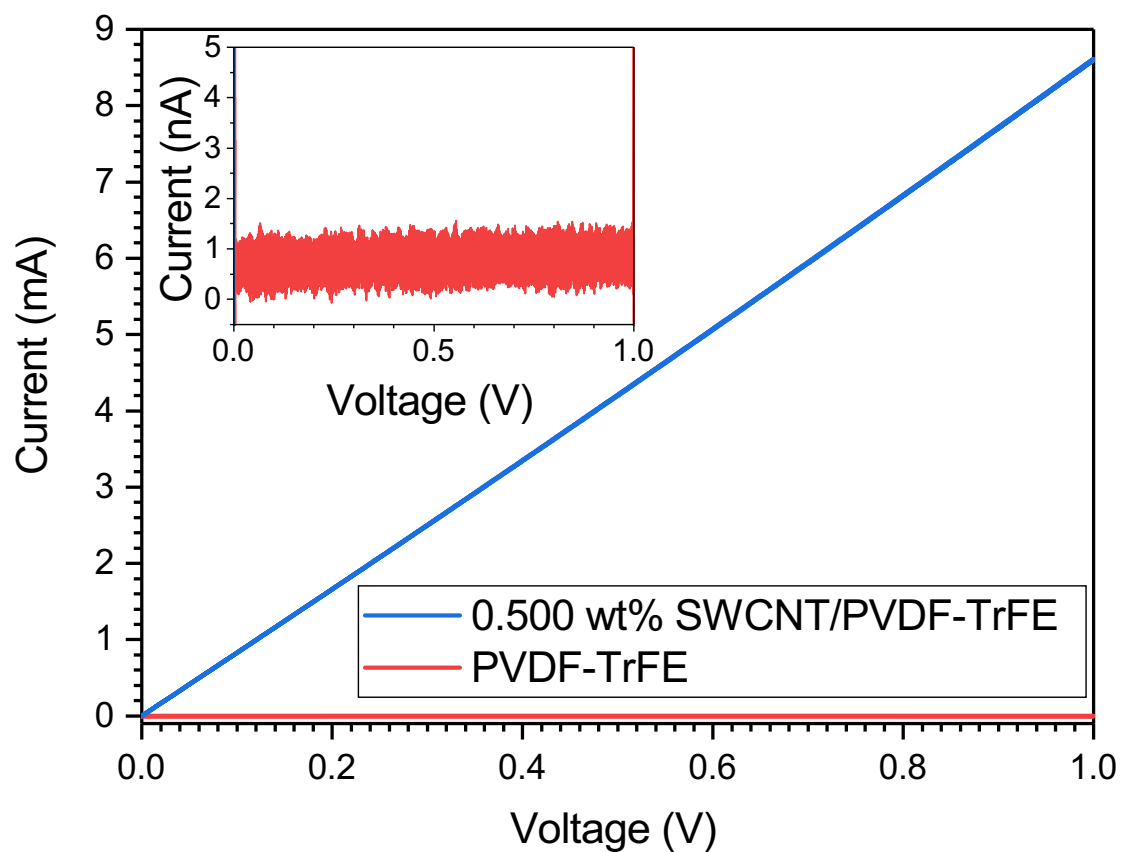

Figure S8: Cyclic voltammetry (CV) for 3D printed SWCNT/PVDF-TrFE (0.000 wt% and 0.500 wt%) films. Inset shows the y-axis expanded to a maximum of  $5 \times 10^{-6}$  mA.

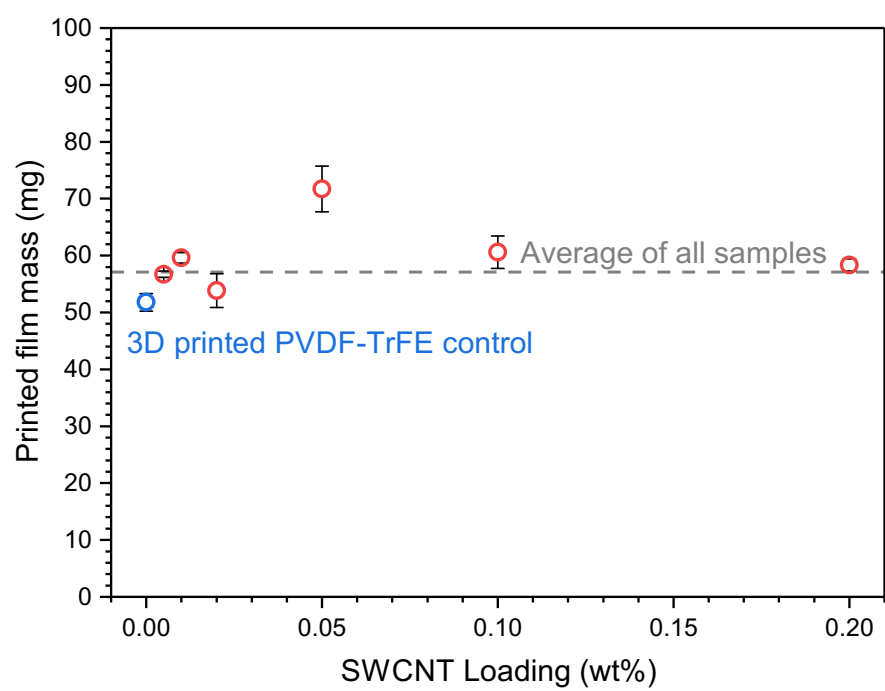

Figure S9: The measured mass for SWCNT/PVDF-TrFE (0.000 wt% to 0.200 wt%) films.

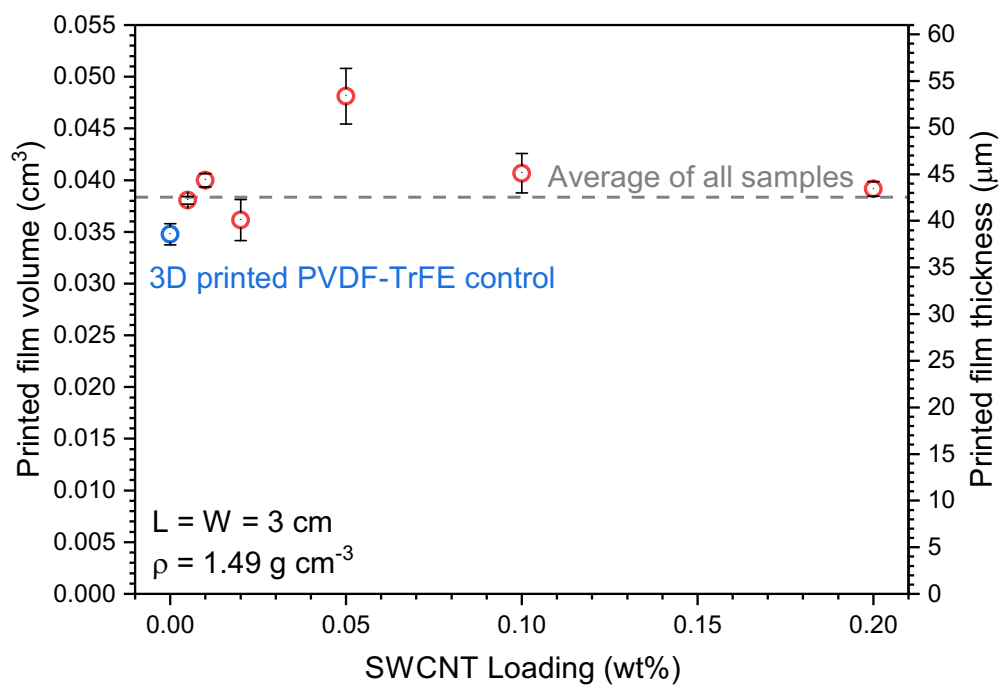

Figure S10: The volume and thickness calculated from Fig. S8 for SWCNT/PVDF-TrFE (0.000 wt% to 0.200 wt%) films. The length and width of the films was 3 cm and density was  $1.49 \text{ g cm}^{-3}$  (75 mol% VDF and 25 mol% TrFE, 420 kDa, Solvay).

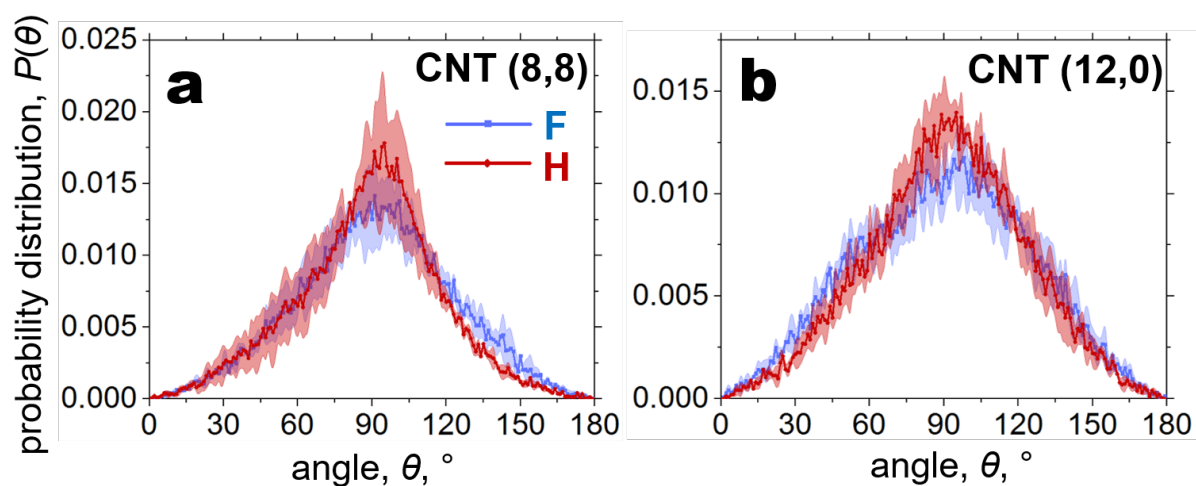

Figure S11: The probability distribution of the angle,  $\theta$ , between the F – C (blue lines) or the C – H (red lines) of the TrFE units and the CNT axis of symmetry having (a) armchair (8,8) and (b) zig-zag (12,0) chirality. The F – C and the C – H branches are mostly perpendicular to the CNT surface. The shaded regions represent the error bar obtained from three different MD simulations.

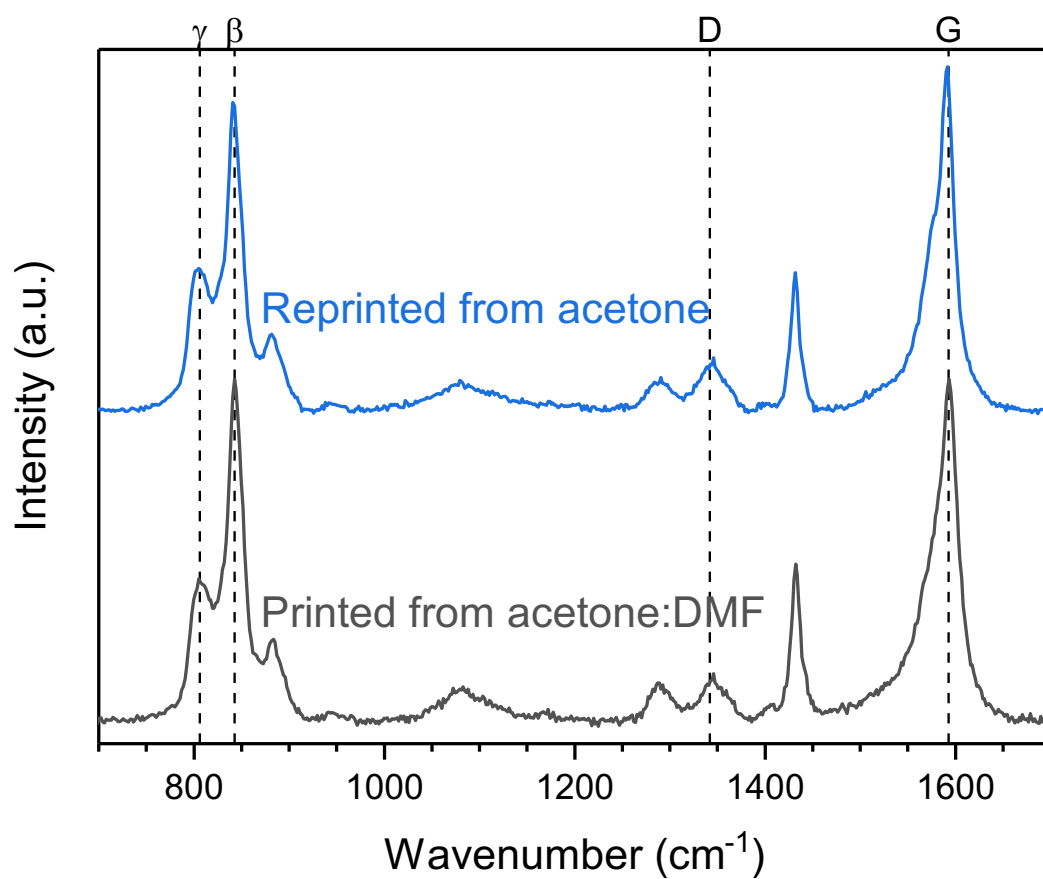

Figure S12: The Raman spectra for the initial 3D printed SWCNT/PVDF-TrFE (0.020 wt%) film (shown in grey) and SWCNT/PVDF-TrFE (0.020 wt%) recycled and reprinted from acetone.

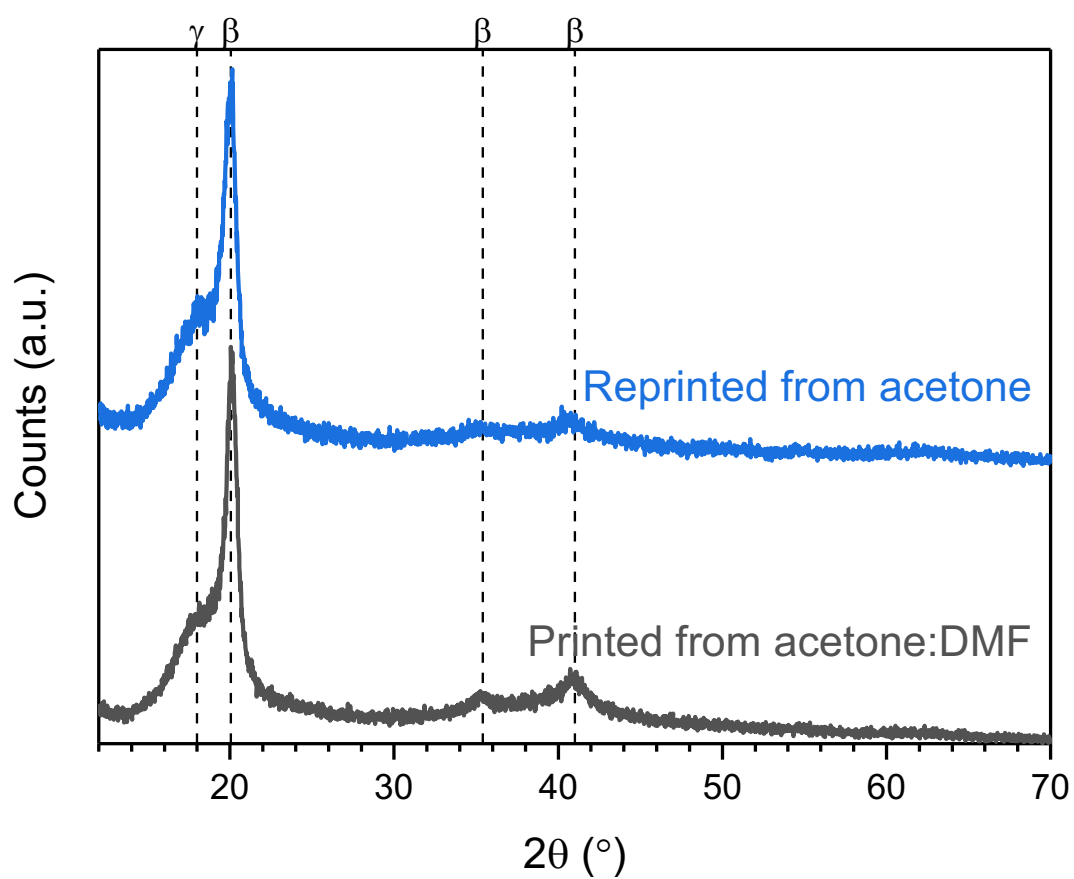

Figure S13: The XRD spectra for the initial 3D printed SWCNT/PVDF-TrFE (0.020 wt%) film (shown in grey) and SWCNT/PVDF-TrFE (0.020 wt%) recycled and reprinted from acetone.

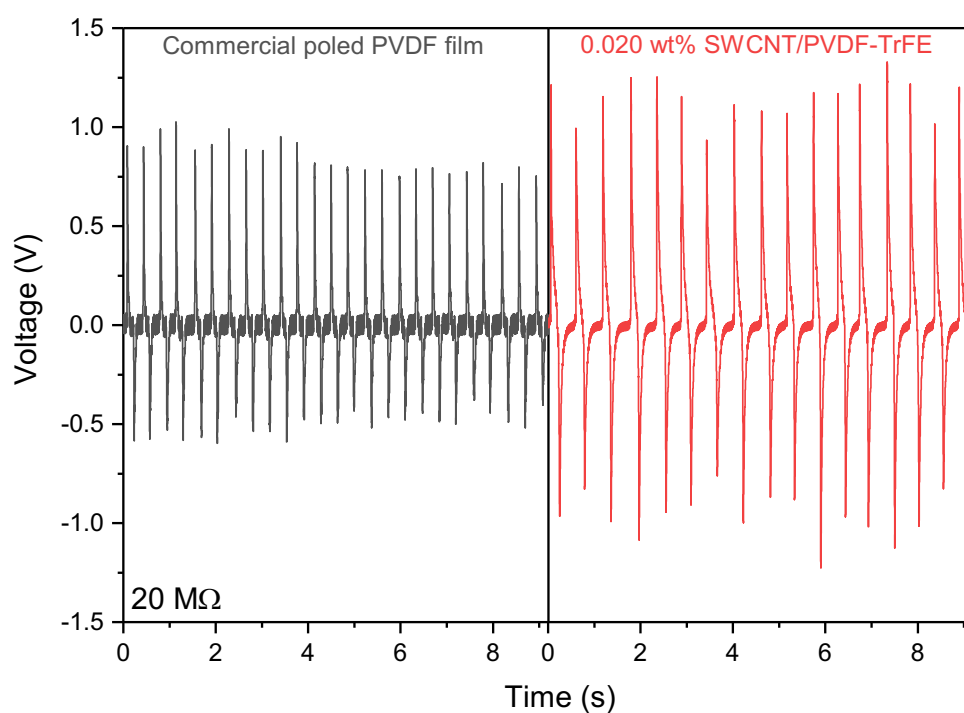

Figure S14: The voltage as a function of time for a PEG made from commercially available poled PVDF film (grey) and a PEG made using the extrusion printed 0.020 wt% SWCNT/PVDF-TrFE film. Low force cyclic compression using a finger pinch was used, with a load resistance of 20 M $\Omega$ .

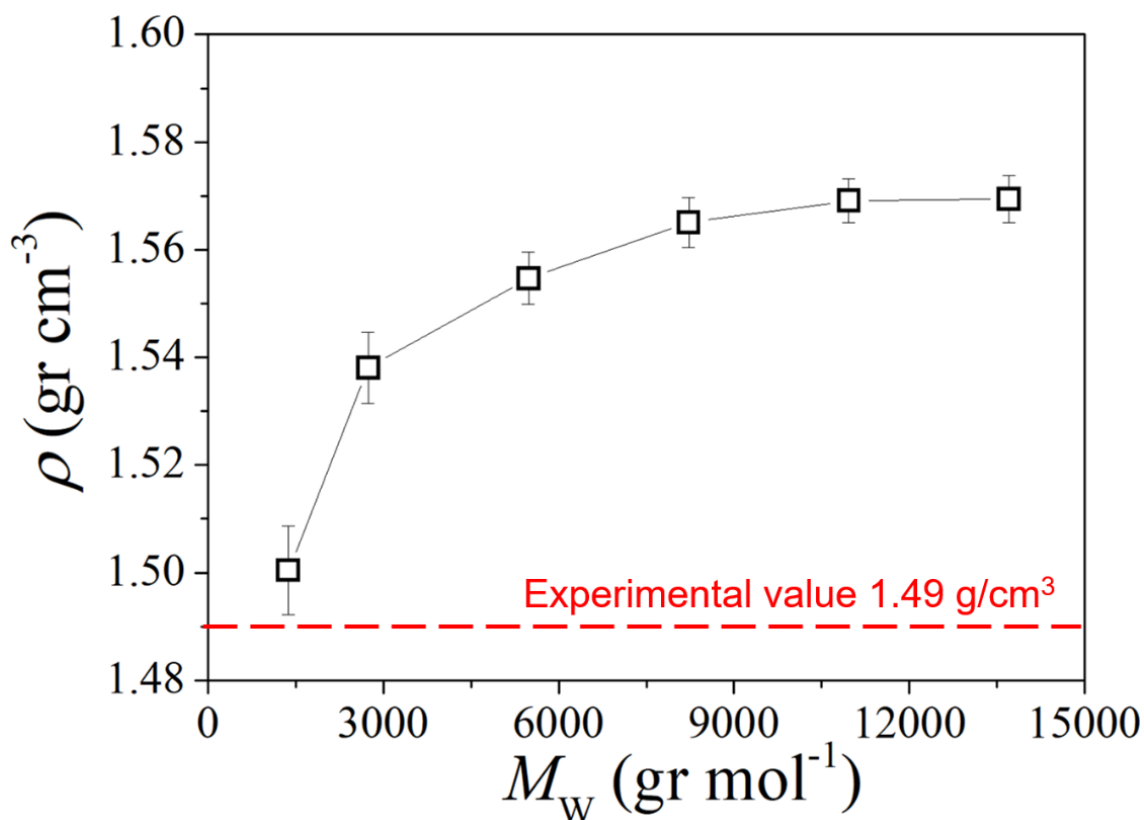

Figure S15: The density of the PVDF-TrFE melt at 230 °C as function of the co-polymer molecular weight obtained by MD simulations (symbols). Increasing the molecular weight leads to a slight increase in the co-polymer density with attains asymptotically a value of about 1.57 g cm<sup>-3</sup> for molecular weights bigger than about 10,000 g mol<sup>-1</sup>. The MD-obtained density is in excellent agreement with the experimental value provided by the PVDF-TrFE manufacturer (Solvay, horizontal broken line).



Table S1: The CNT/fluoropolymer energy harvesting figures of merit found in recent literature and the materials and processes used to fabricate the PEGs.

| CNT type | Polymer type                      | CNT concentration (wt%) | Power density ( $\mu\text{W}/\text{cm}^3$ ) | Deposition technique         | Poling technique                                                                  | Reference                       |
|----------|-----------------------------------|-------------------------|---------------------------------------------|------------------------------|-----------------------------------------------------------------------------------|---------------------------------|
| MWCNT    | PVDF                              | 0.075                   | 0.45                                        | Spray coating                | Unpoled                                                                           | Lee <i>et al.</i> <sup>1</sup>  |
| MWCNT    | PVDF                              | 0.050                   | 59.4                                        | Solvent casting              | Drawing (60 °C) up to 400-500% and electrode poling up to 60 MV/m in silicone oil | Ning <i>et al.</i> <sup>2</sup> |
| SWCNT    | PVDF-TrFE                         | 0.100                   | 1481.5                                      | Solvent casting              | Electrode poling 58 MV/m at 43 °C in silicone oil                                 | Kim <i>et al.</i> <sup>3</sup>  |
| MWCNT    | PVDF                              | 0.030                   | 26.2                                        | Electrospinning (1.5 MV/m)   | Electrode poling 7 MV/m at 80 °C                                                  | Liu <i>et al.</i> <sup>4</sup>  |
| MWCNT    | PVDF-HFP                          | 0.050                   | 4.0                                         | Solvent casting              | Drawing (60 °C) up to 400-500% and electrode poling up to 60 MV/m in silicone oil | Wu <i>et al.</i> <sup>5</sup>   |
| SWCNT    | PVDF-TrFE                         | 0.020                   | 20.0                                        | 3D printing                  | Unpoled                                                                           | This work                       |
| SWCNT    | PVDF-TrFE (recycled from acetone) | 0.020                   | 70.6                                        | 3D printing in green solvent | Unpoled                                                                           | This work                       |

## References

- 1 S. Lee and Y. Lim, *Macromol. Mater. Eng.*, 2018, **303**, 1700588.
- 2 H. M. Ning, N. Hu, T. Kamata, J. H. Qiu, X. Han, L. M. Zhou, C. Chang, Y. Liu, L. K. Wu, J. H. Qiu, H. L. Ji, W. X. Wang, Y. Zemba, S. Atobe, Y. Li, Alamusi and H. Fukunaga, *Smart Mater. Struct.*, 2013, **22**, 065011.
- 3 J. Kim, K. J. Loh and J. P. Lynch, in *Sensors and Smart Structures for Civil, Mechanical, and Aerospace Systems 2008*, Proc. SPIE 6932, San Diego, California, United States, 2008, p. 693232.
- 4 Z. H. Liu, C. T. Pan, L. W. Lin and H. W. Lai, *Sensors Actuators, A Phys.*, 2013, **193**, 13–24.
- 5 L. Wu, W. Yuan, T. Nakamura, S. Atobe, N. Hu, H. Fukunaga, C. Chang, Y. Zemba, Y. Li, T. Watanabe, Y. Liu, Alamusi, H. Ning, J. Li, H. Cui and Y. Zhang, *Adv. Compos. Mater.*, 2013, **22**, 49–63.

## **Supplementary videos**

Video S1: Time evolution of the dipole moment vector for the adsorption of two PVDF-TrFE chains on SWCNTs with (8,8) chirality on top and (12,0) chirality on the bottom.

Video S2: The dissolution of PVDF and PVDF-TrFE in 5 mL acetone at 1/8 speed. 3D printed PVDF-TrFE film, 3D printed SWCNT/PVDF-TrFE (0.020 wt%) film, 3D printed SWCNT/PVDF-TrFE (0.200 wt%) film, melt-extruded and poled PVDF film, solvent-cast PVDF-TrFE film and PVDF-TrFE powder are shown.
